# Supplementary figures and images for: ATP hydrolysis by the viral RNA sensor RIG-I prevents unintentional recognition of self-RNA
Source: eLife journal article supplement (doi:10.7554/elife.10859), 2015-11-26

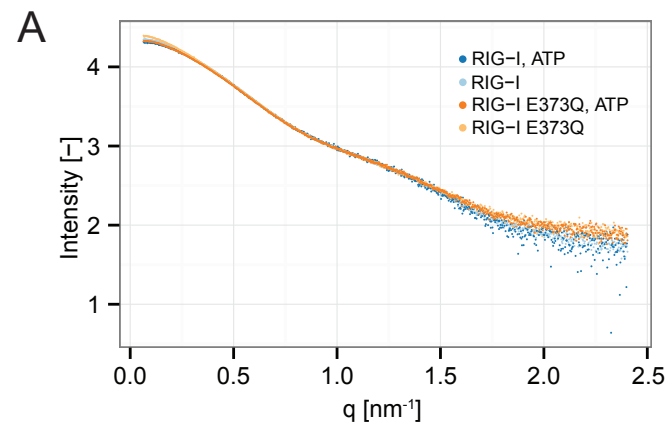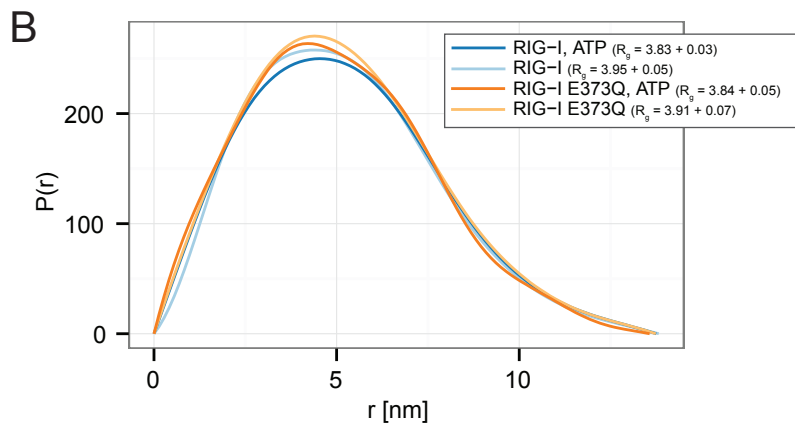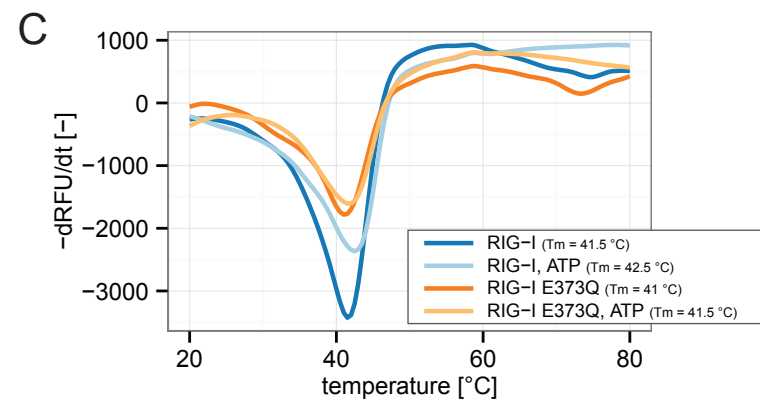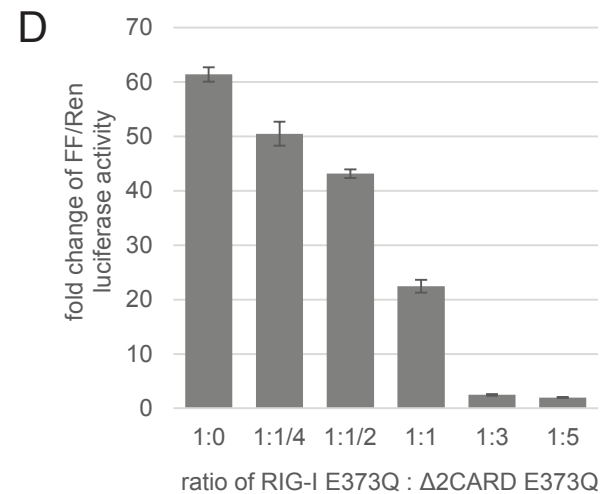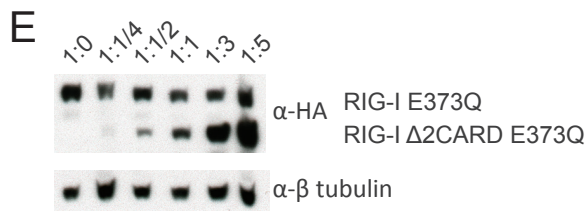

Supplement: supp [file elife-10859-supp-v1.zip]

A

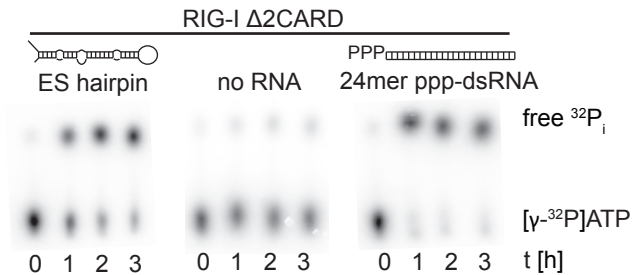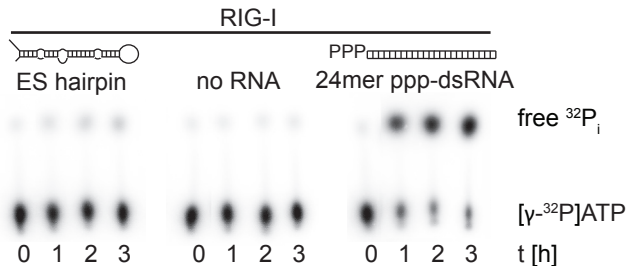

B

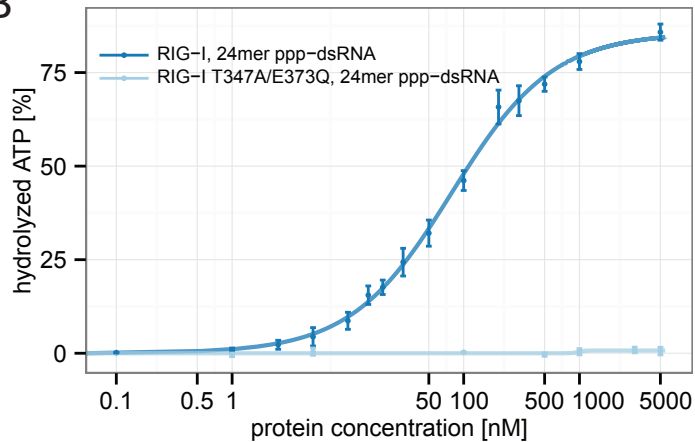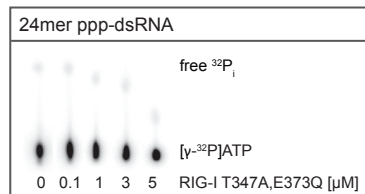

Supplement: supp [file elife-10859-supp-v1.zip]

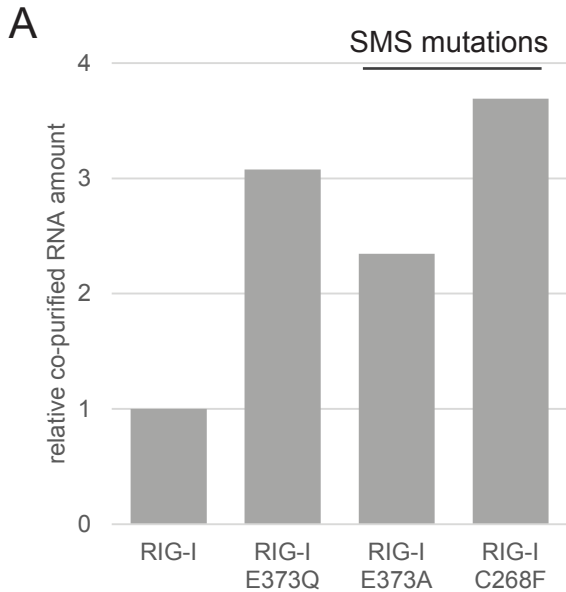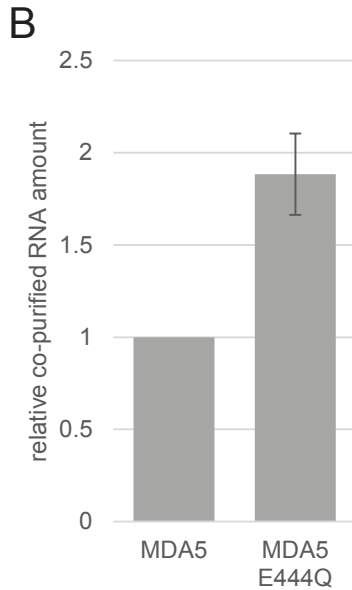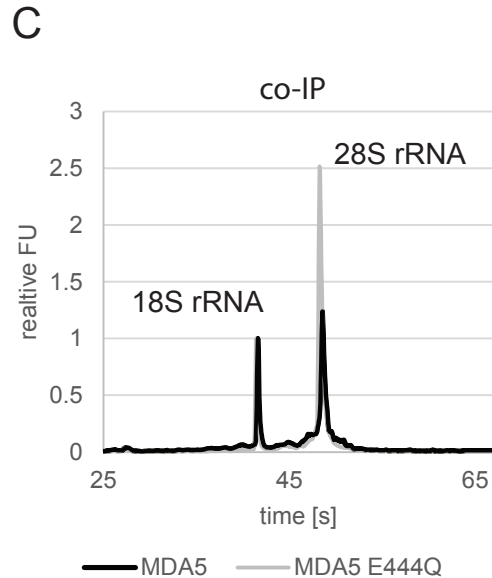

Supplement: supp [file elife-10859-supp-v1.zip]

A

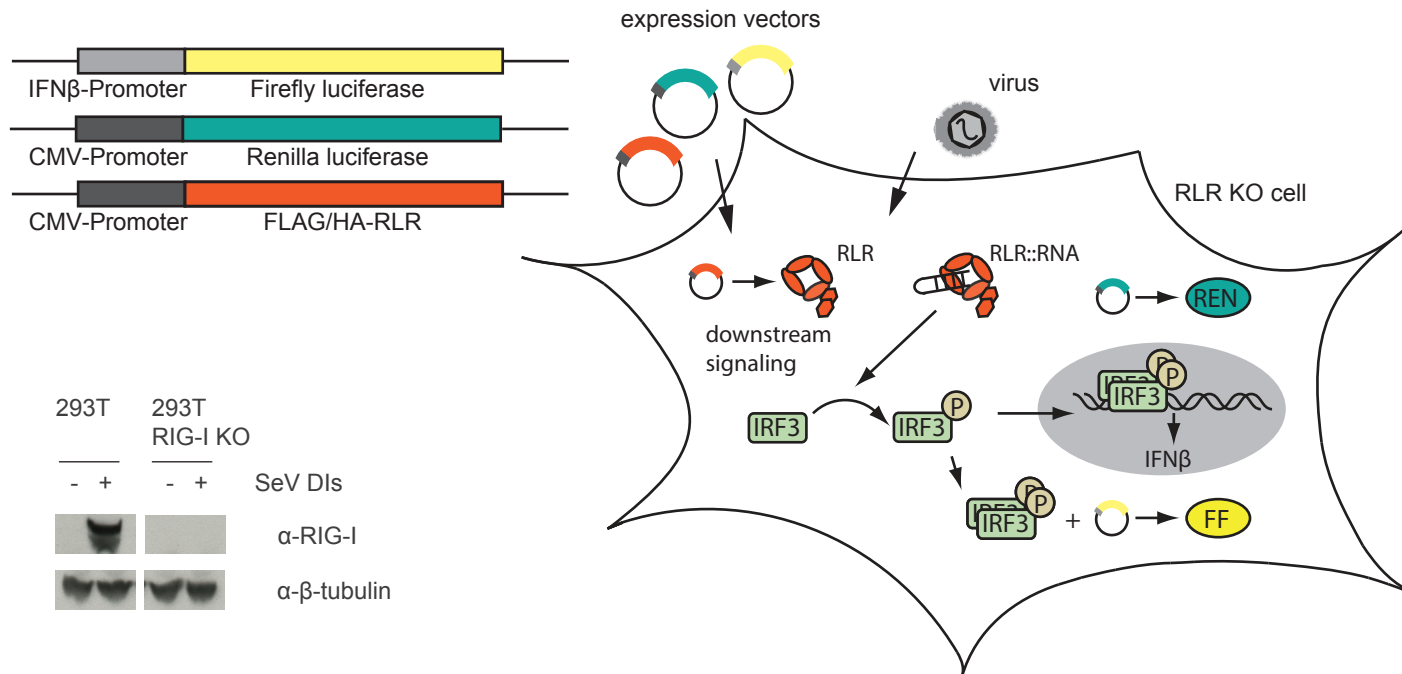

B

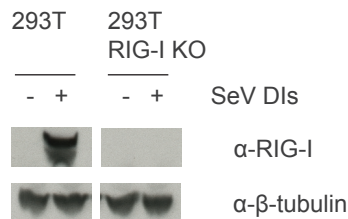

C

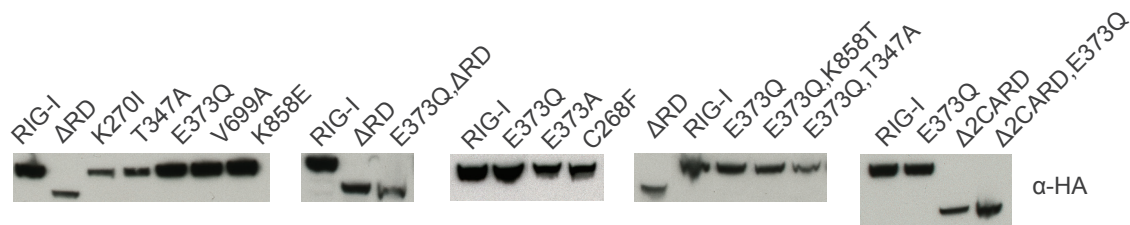

Supplement: supp [file elife-10859-supp-v1.zip]

A

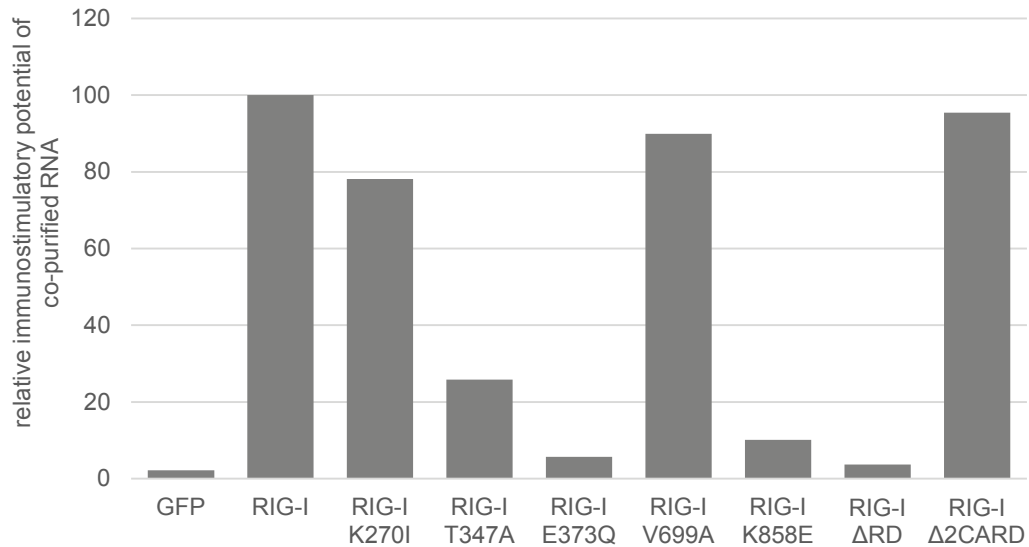

Supplement: supp [file elife-10859-supp-v1.zip]

A

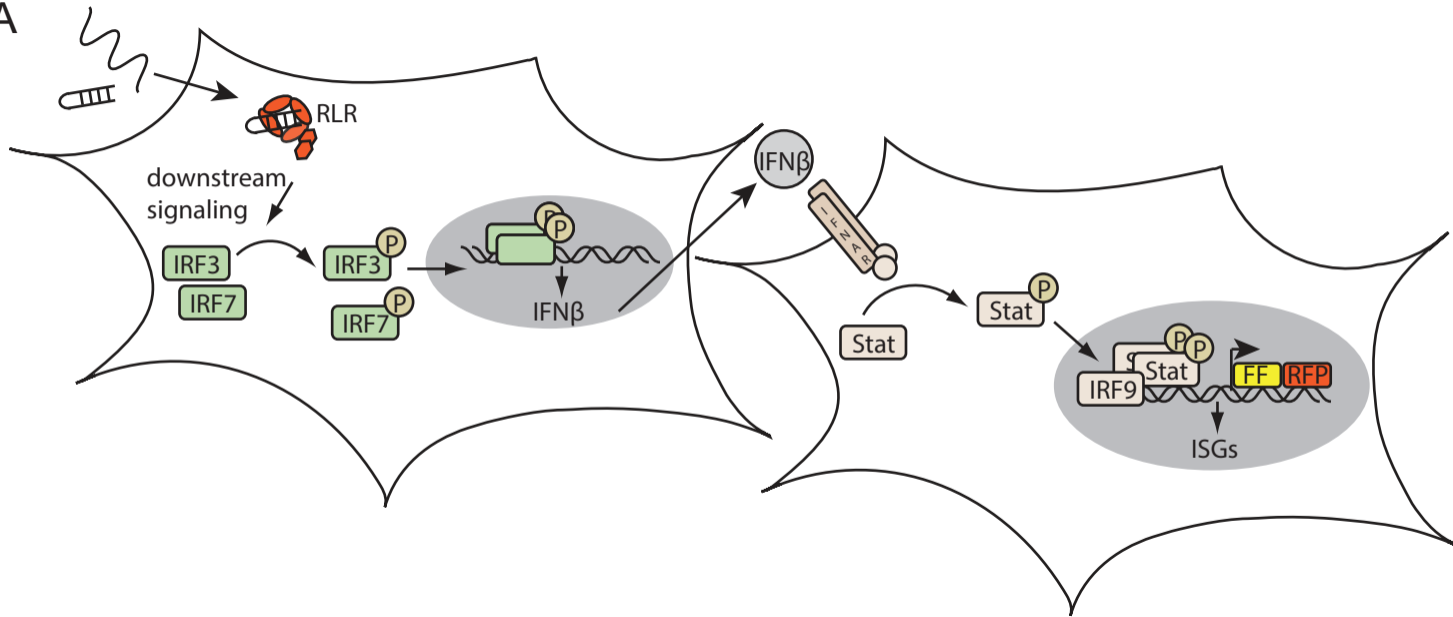

Supplement: supp [file elife-10859-supp-v1.zip]

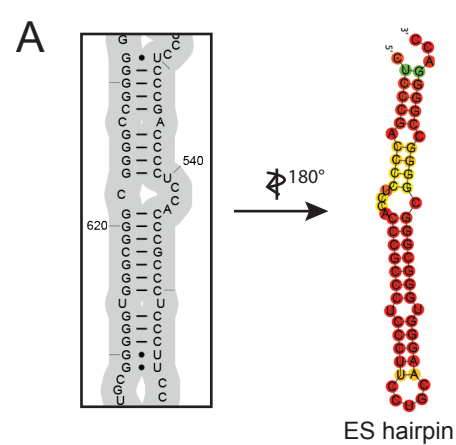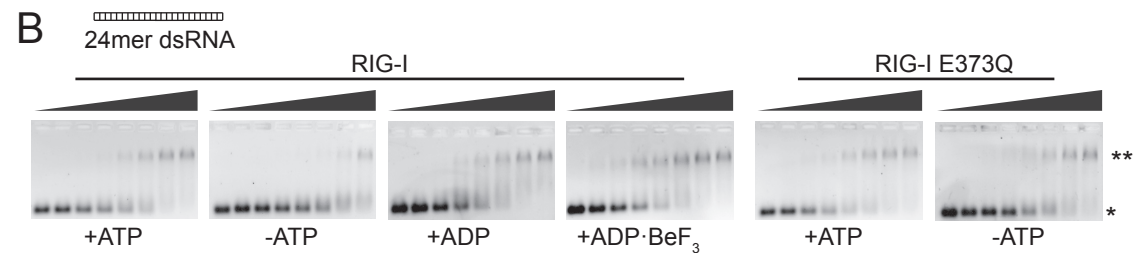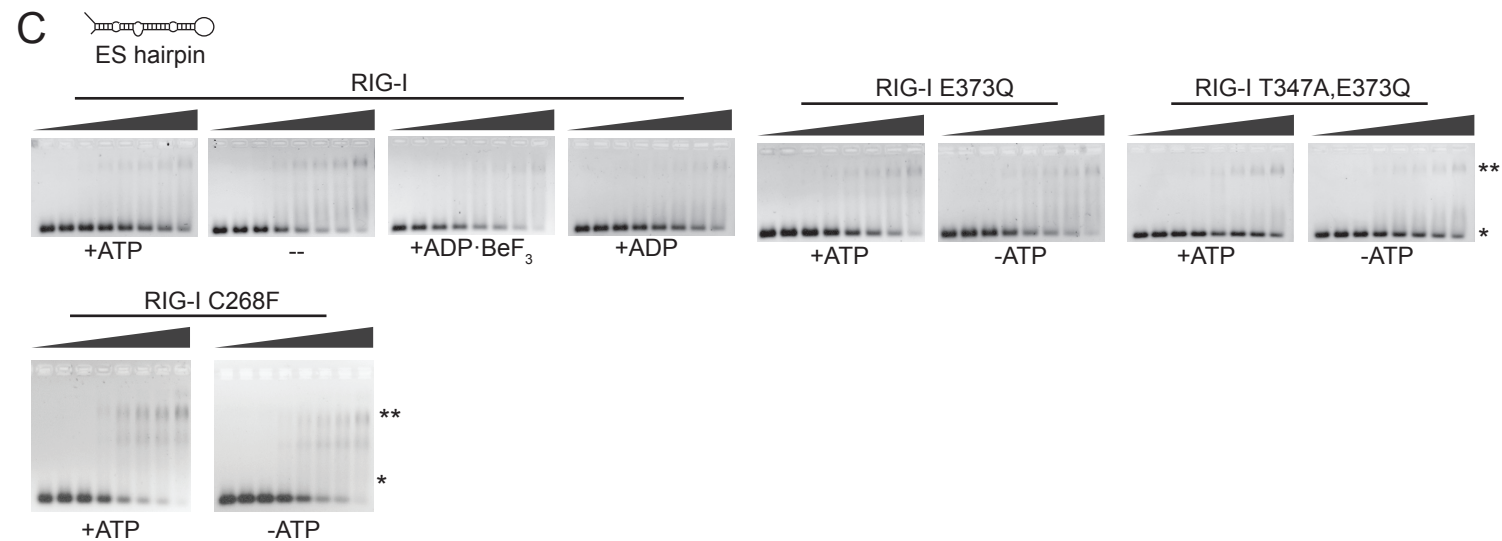

Supplement: supp [file elife-10859-supp-v1.zip]
